# Supplementary material for: Whole-Body Hypothermia, Cerebral Magnetic Resonance Biomarkers, and Outcomes in Neonates With Moderate or Severe Hypoxic-Ischemic Encephalopathy Born at Tertiary Care Centers vs Other Facilities: A Nested Study Within a Randomized Clinical Trial
Source: PubMed Central journal article supplement (PMC10167567; doi:10.1001/jamanetworkopen.2023.12152), 2023-05-08

## Supplementary Online Content

Thayyil S, Montaldo P, Krishnan V, et al. Whole-body hypothermia, cerebral magnetic resonance biomarkers, and outcomes in neonates with moderate or severe hypoxic-ischemic encephalopathy born at tertiary care centers vs other facilities: a nested study within a randomized clinical trial. *JAMA Netw Open*. 2023;6(5):e2312152.  
doi:10.1001/jamanetworkopen.2023.12152

**eTable 1.** Baseline Characteristics of Inborn and Outborn Neonates

**eTable 2.** Clinical Characteristics of Neonates With and Without MR Imaging (MRI)

**eFigure 1.** Flowchart

**eFigure 2.** Mean (SD) Rectal Temperature of Inborn (Top Panel) and Outborn (Bottom Panel) Neonates

**eFigure 3.** Treatment Effects of Whole-Body Hypothermia on Whole-Brain White Matter Fractional Anisotropy Quantified by Tract-Based Spatial Statistics Among Inborn (A) and Outborn (B) Neonates

This supplemental material has been provided by the authors to give readers additional information about their work.

**eTable 1.** Baseline Characteristics of Inborn and Outborn Neonates

|                                   | N   | Inborn (n=123) | N   | Outborn (n=285) | P-value |
|-----------------------------------|-----|----------------|-----|-----------------|---------|
| Maternal age, year                | 117 | 25.7 (5.0)     | 278 | 23.7 (4.2)      | 0.001   |
| Booked pregnancies*               | 123 | 122 (99.2%)    | 278 | 264 (94.9%)     | 0.02    |
| Primigravida                      | 123 | 67 (54.5%)     | 284 | 168 (59.2%)     | 0.38    |
| Diabetes                          | 123 | 1 (0.8%)       | 285 | 1 (0.4%)        | 1.00    |
| Hypertension                      | 123 | 8 (6.5%)       | 285 | 5 (1.7%)        | 0.02    |
| Thyroid disorders                 | 123 | 0              | 285 | 1 (0.4%)        | 1.00    |
| Complications of delivery±        | 122 | 43 (35.2%)     | 267 | 35 (13.1%)      | 0.01    |
| Maternal pyrexia                  | 121 | 5 (4.1%)       | 267 | 3 (1.1%)        | 0.02    |
| Rupture of membranes >24h         | 121 | 0              | 262 | 4 (1.5%)        | 0.06    |
| Meconium-stained amniotic fluid   | 123 | 47 (38.2%)     | 269 | 63 (23.4%)      | 0.0001  |
| Reduced fetal movements           | 114 | 13 (11.4%)     | 221 | 11 (4.9%)       | 0.0001  |
| Fetal heart rate decelerations    | 116 | 16 (13.8%)     | 208 | 7 (3.4%)        | 0.0001  |
| Funisitis                         | 121 | 21 (17.3%)     | 245 | 45 (18.4%)      | 0.01    |
| <b>Perinatal sentinel events±</b> | 123 | 20 (16.3%)     | 285 | 23 (8.1%)       | 0.02    |
| Cord prolapse                     | 123 | 4 (3.3%)       | 285 | 6 (2.1%)        | 0.50    |
| Cord around neck                  | 123 | 2 (1.6%)       | 285 | 6 (2.1%)        | 1.00    |
| Prolonged second stage            | 123 | 7 (5.7%)       | 285 | 4 (1.4%)        | 0.05    |
| Obstructed labor                  | 123 | 2 (1.6%)       | 285 | 3 (1.1%)        | 0.64    |
| Shoulder dystocia                 | 123 | 0              | 285 | 1 (0.4%)        | 1.00    |
| Antepartum hemorrhage             | 123 | 5* (4.0%)      | 285 | 3** (1.1%)      | 0.37    |
| <b>Mode of delivery</b>           |     |                |     |                 |         |
| Instrumental delivery             | 123 | 18 (14.6%)     | 283 | 22 (7.8%)       | 0.01    |
| Pre-labor caesarean delivery      | 123 | 3 (2.4%)       | 283 | 0               |         |
| In-labor caesarean delivery       | 123 | 32 (26.0%)     | 283 | 48 (16.9%)      |         |

|                                                             |     |             |     |               |        |
|-------------------------------------------------------------|-----|-------------|-----|---------------|--------|
| Spontaneous vaginal delivery                                | 123 | 70 (56.9%)  | 283 | 213 (75.3%)   |        |
| <b>Condition at birth</b>                                   |     |             |     |               |        |
| Cord blood pH at delivery                                   | 33  | 6.92 (0.18) | 13  | 7.04 (0.30)   | 0.73   |
| Apgar score at 5 min, median<br>[interquartile range]       | 122 | 4 [3-5]     | 150 | 4 [2-5]       | 0.21   |
| Apgar score at 10 min, median<br>[interquartile range]      | 98  | 6 [5-7]     | 34  | 5 [4-7]       | 0.09   |
| Endotracheal ventilation at birth                           | 123 | 97 (78.9%)  | 278 | 81 (29.1%)    | 0.001  |
| <b>Infant size and condition</b>                            |     |             |     |               |        |
| Birth weight, grams                                         | 123 | 2815 (460)  | 285 | 2924 (448)    | 0.02   |
| Birth weight < 2 standard deviations                        | 123 | 28 (22.8%)  | 285 | 36 (12.6%)    | 0.13   |
| Head circumference, cm                                      | 122 | 34.0 (1.7)  | 284 | 34.2 (1.3)    | 0.21   |
| Head circumference < 2 SD from the mean                     | 122 | 6 (4.9%)    | 284 | 8 (2.8%)      | 0.47   |
| Age of neonate (Gestation, weeks)                           | 123 | 38.5 (1.5)  | 284 | 38.7 (1.2)    | 0.18   |
| Age at admission to the NICU at the cooling centre, minutes | 123 | 30 [15-50]  | 285 | 180 [123-240] | 0.001  |
| Males                                                       | 123 | 80 (65.0%)  | 285 | 187 (65.6%)   | 0.91   |
| Moderate encephalopathy                                     | 123 | 94 (76.4%)  | 285 | 234 (82.1%)   | 0.22   |
| Severe encephalopathy                                       |     | 29 (23.6%)  |     | 51 (17.9%)    |        |
| Rectal temperature at randomisation                         | 120 | 35.9 (1.1)  | 269 | 36.0 (0.9)    | 0.36   |
| Clinical seizures at admission                              | 123 | 75 (61.0%)  | 285 | 224 (78.6%)   | <0.001 |
| MR imaging performed                                        | 123 | 82 (66.7%)  | 285 | 202 (70.9%)   | 0.41   |

Data are number of patients (%), mean (SD), or median [IQR]; \*2 placenta previa, 3 abruptions; \*\*3 abruption; ±Not mutually exclusive.

**eTable 2.** Clinical Characteristics of Neonates With and Without MR Imaging (MRI)

|                                                        | <b>MRI performed<br/>(n=284)</b> | <b>MRI not performed<br/>(n=124)</b> | <b>P Value</b> |
|--------------------------------------------------------|----------------------------------|--------------------------------------|----------------|
| Birth weight, grams                                    | 2918 (428)                       | 2832 (507)                           | 0.08           |
| Head circumference, cm                                 | 34.1 (1.5)                       | 34.5 (1.5)                           | 0.006          |
| Head circumference < 2 SD                              | 10 (3.5%)                        | 4 (3.2%)                             | 0.099          |
| Age of neonate (Gestation, weeks)                      | 38.7 (1.3)                       | 38.6 (1.2)                           | 0.46           |
| Age at admission to the NICU, minutes,<br>median [IQR] | 139 [60-231]                     | 140 [56-227]                         | 0.98           |
| Cord blood pH at delivery                              | 6.9 (0.2)                        | 6.8 (0.3)                            | 0.06           |
| Apgar score at 5 min, median [IQR]                     | 5 [4-6]                          | 4 [3-5]                              | 0.004          |
| Apgar score at 10 min, median [IQR]                    | 6 [5-7]                          | 5 [4-7]                              | 0.04           |
| Intubation at birth                                    | 106 (37.3%)                      | 72 (58.1%)                           | <0.001         |
| Antepartum hemorrhage                                  | 4 (1.4%)                         | 4 (3.2%)                             | 0.25           |
| <b>Place of birth</b>                                  |                                  |                                      |                |
| Inborn babies                                          | 82 (28.9%)                       | 41 (33.1%)                           | 0.41           |
| Outborn babies                                         | 202 (71.1%)                      | 83 (66.9%)                           |                |
| <b>Severity of encephalopathy at<br/>randomisation</b> |                                  |                                      |                |
| Moderate encephalopathy                                | 254 (89.4%)                      | 74 (59.7%)                           | <0.001         |
| Severe encephalopathy                                  | 30 (10.6%)                       | 50 (40.3%)                           |                |
| <b>Neonatal morbidity</b>                              |                                  |                                      |                |
| Gastric bleeding                                       | 30 (10.6%)                       | 66 (53.2%)                           | <0.001         |
| Pulmonary hemorrhage                                   | 15 (5.3%)                        | 55 (44.3%)                           | <0.001         |
| Prolonged coagulation                                  | 56 (19.7%)                       | 75 (60.5%)                           | <0.001         |

|                                      |            |             |        |
|--------------------------------------|------------|-------------|--------|
| Culture proven early onset sepsis    | 17 (6.0%)  | 5 (4.0%)    | 0.24   |
| Severe thrombocytopenia              | 22 (7.7%)  | 26 (21.0%)  | <0.001 |
| Persistent metabolic acidosis        | 9 (3.2%)   | 61 (49.2%)  | <0.001 |
| Persistent pulmonary hypertension    | 12 (4.2%)  | 28 (22.6%)  | <0.001 |
| <b>Outcomes at 18 to 22 months</b>   |            |             |        |
| Death up until 18 months             | 25 (8.8%)  | 122 (98.4%) | <0.001 |
| Death, moderate or severe disability | 70 (24.6%) | 122 (98.4%) | <0.001 |

Data are number of patients (%), mean (SD), or median [IQR]

**eFigure 1. Flowchart**

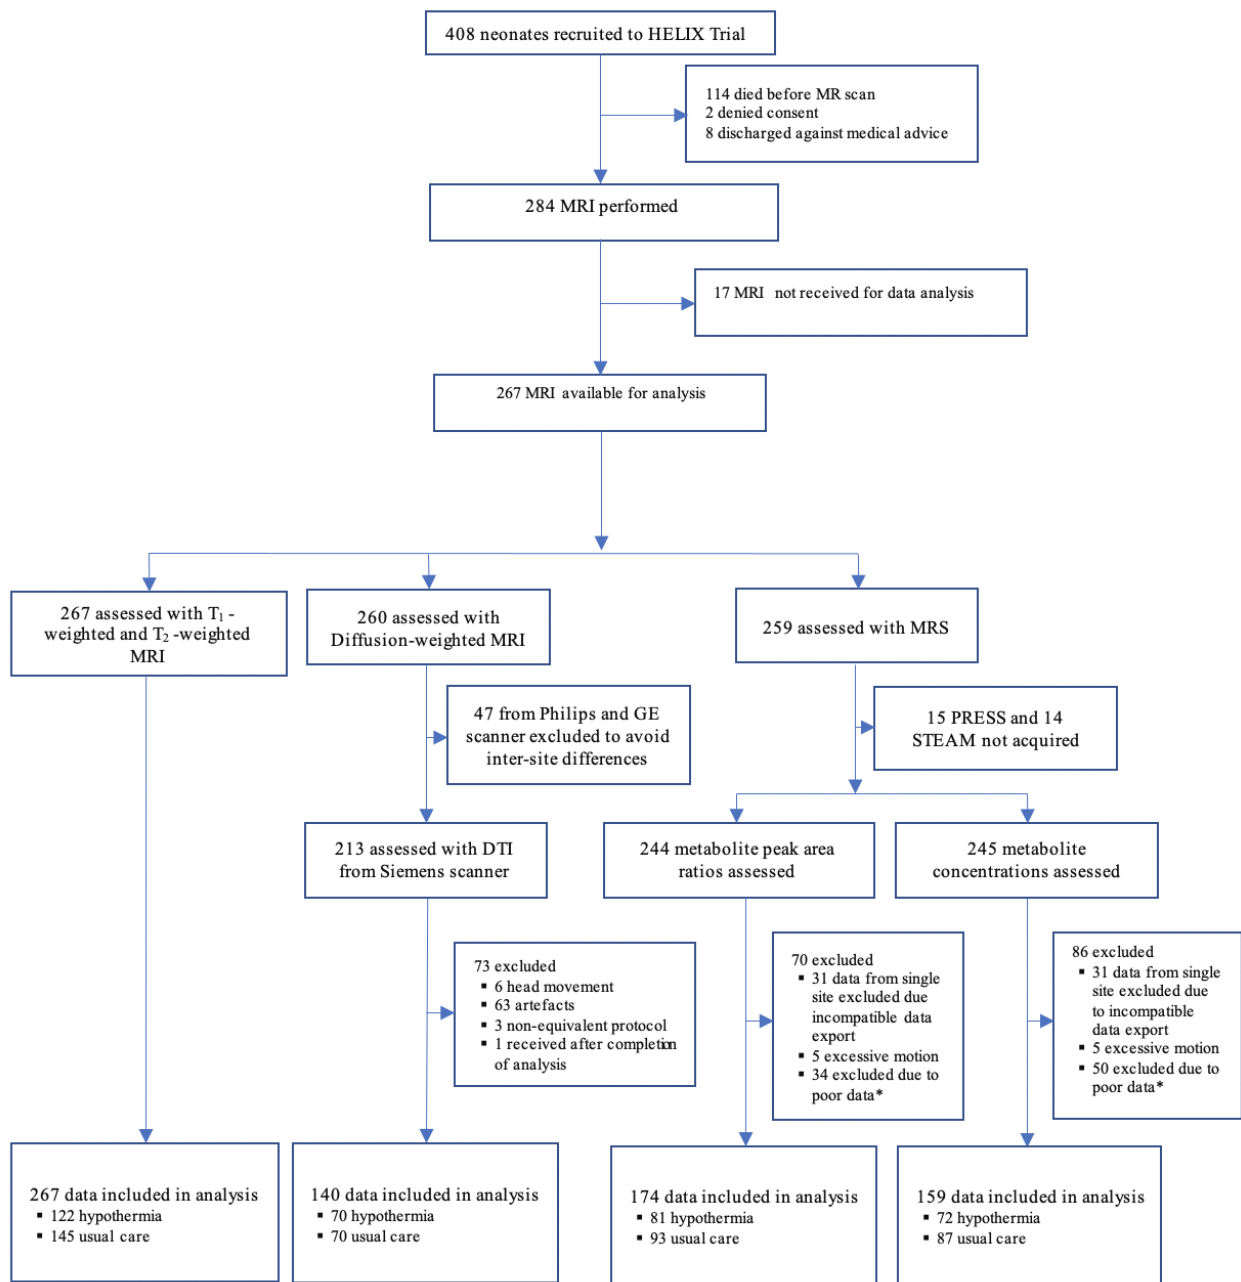

Thayyil et al. *Lancet Global Health*. 2021  
 DOI: [https://doi.org/10.1016/S2214-109X\(21\)00264-3](https://doi.org/10.1016/S2214-109X(21)00264-3)

**eFigure 2.** Mean (SD) Rectal Temperature of Inborn (Top Panel) and Outborn (Bottom Panel) Neonates

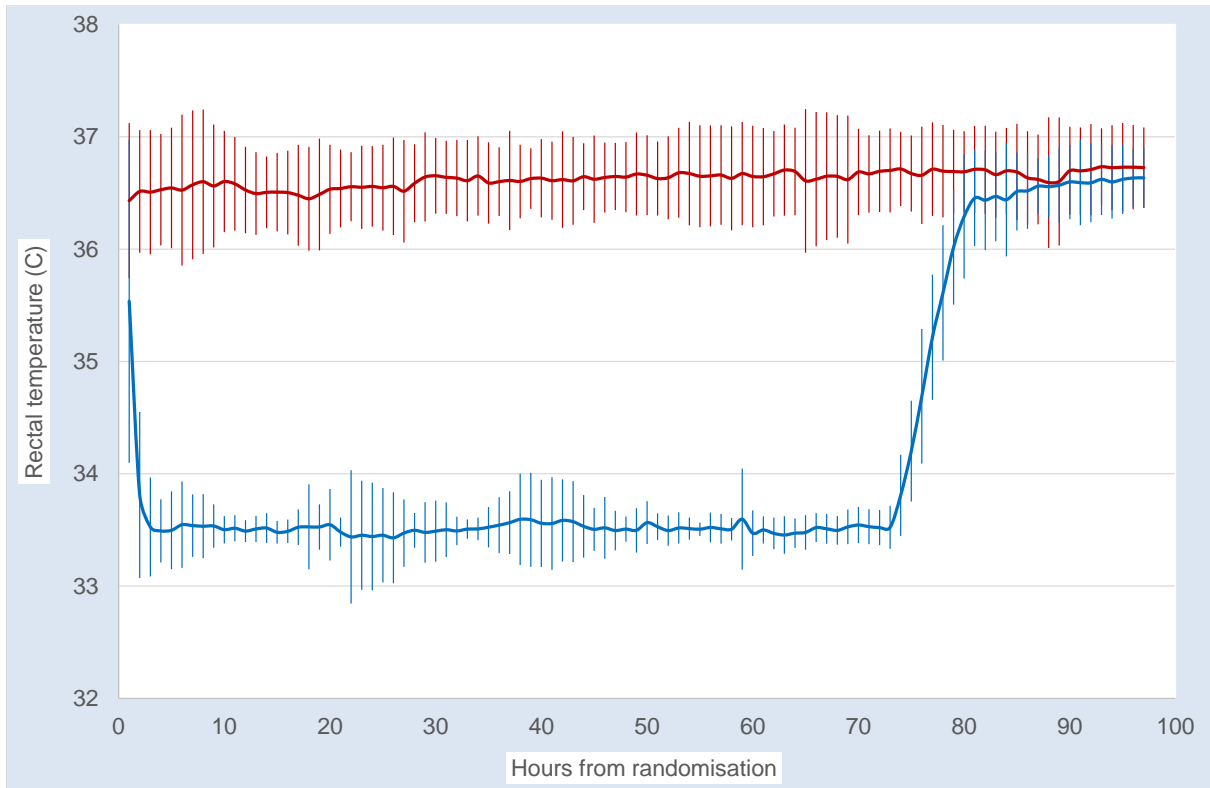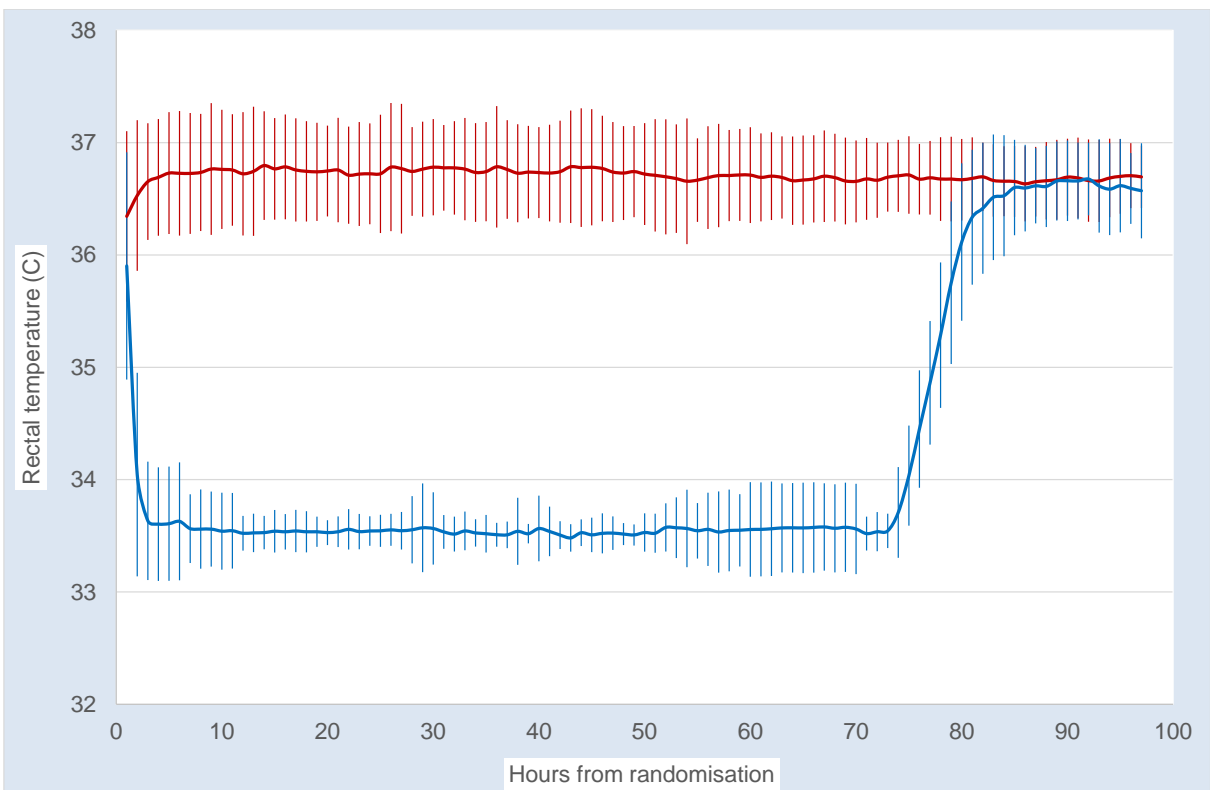

**eFigure 3.** Treatment Effects of Whole-Body Hypothermia on Whole-Brain White Matter Fractional Anisotropy Quantified by Tract-Based Spatial Statistics Among Inborn (A) and Outborn (B) Neonates

Mean fractional anisotropy tract skeleton with threshold range of 0.15 (lower) and 1.0 (upper) over regions showed no statistically significant groupwise differences in fractional anisotropy between control or hypothermia babies in either inborn (A) or outborn (B) groups. Statistically significant ( $p < 0.05$ ) regions would be colored in red and yellow.

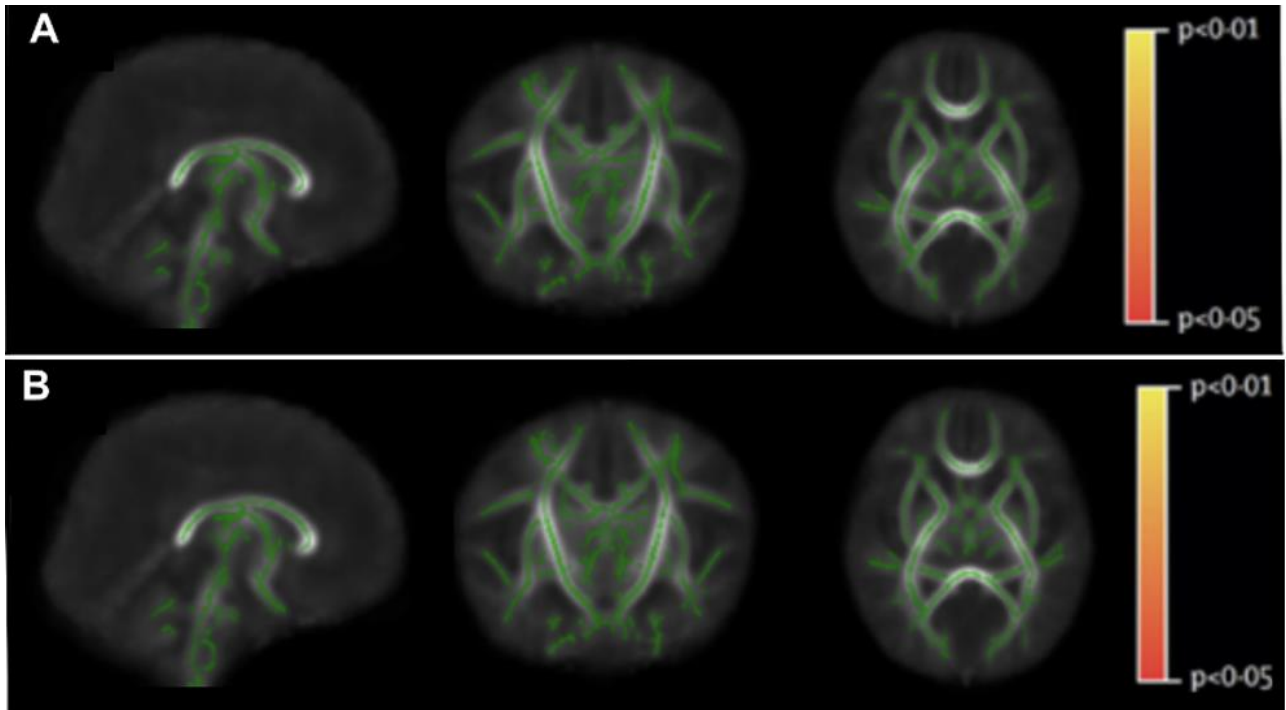

Supplement: jamanetwopen-e2312152-s002.pdf [file jamanetwopen-e2312152-s002.pdf]
