# Supplementary material for: Whole-Body Hypothermia, Cerebral Magnetic Resonance Biomarkers, and Outcomes in Neonates With Moderate or Severe Hypoxic-Ischemic Encephalopathy Born at Tertiary Care Centers vs Other Facilities: A Nested Study Within a Randomized Clinical Trial
Source: PubMed Central journal article supplement (PMC10167567; doi:10.1001/jamanetworkopen.2023.12152), 2023-05-08
Supplement: jamanetwopen-e2312152-s003.pdf [file jamanetwopen-e2312152-s003.pdf]

## Data Sharing Statement

Thayyil. Whole-Body Hypothermia, Cerebral Magnetic Resonance Biomarkers, and Outcomes in Neonates With Moderate or Severe Hypoxic-Ischemic Encephalopathy Born at Tertiary Care Centers vs Other Facilities. *JAMA Netw Open*. Published May 08, 2023.  
doi:10.1001/jamanetworkopen.2023.12152

### Data

**Data available:** No

### Additional Information

**Explanation for why data not available:** Additional secondary papers are currently being written up. Once these are reported the data will be made publicly available
